# Supplementary material
Source: PubMed Central journal article supplement (PMC3492920)
Supplement: stem0029-1705-SD1.pdf [file stem0029-1705-SD1.pdf]

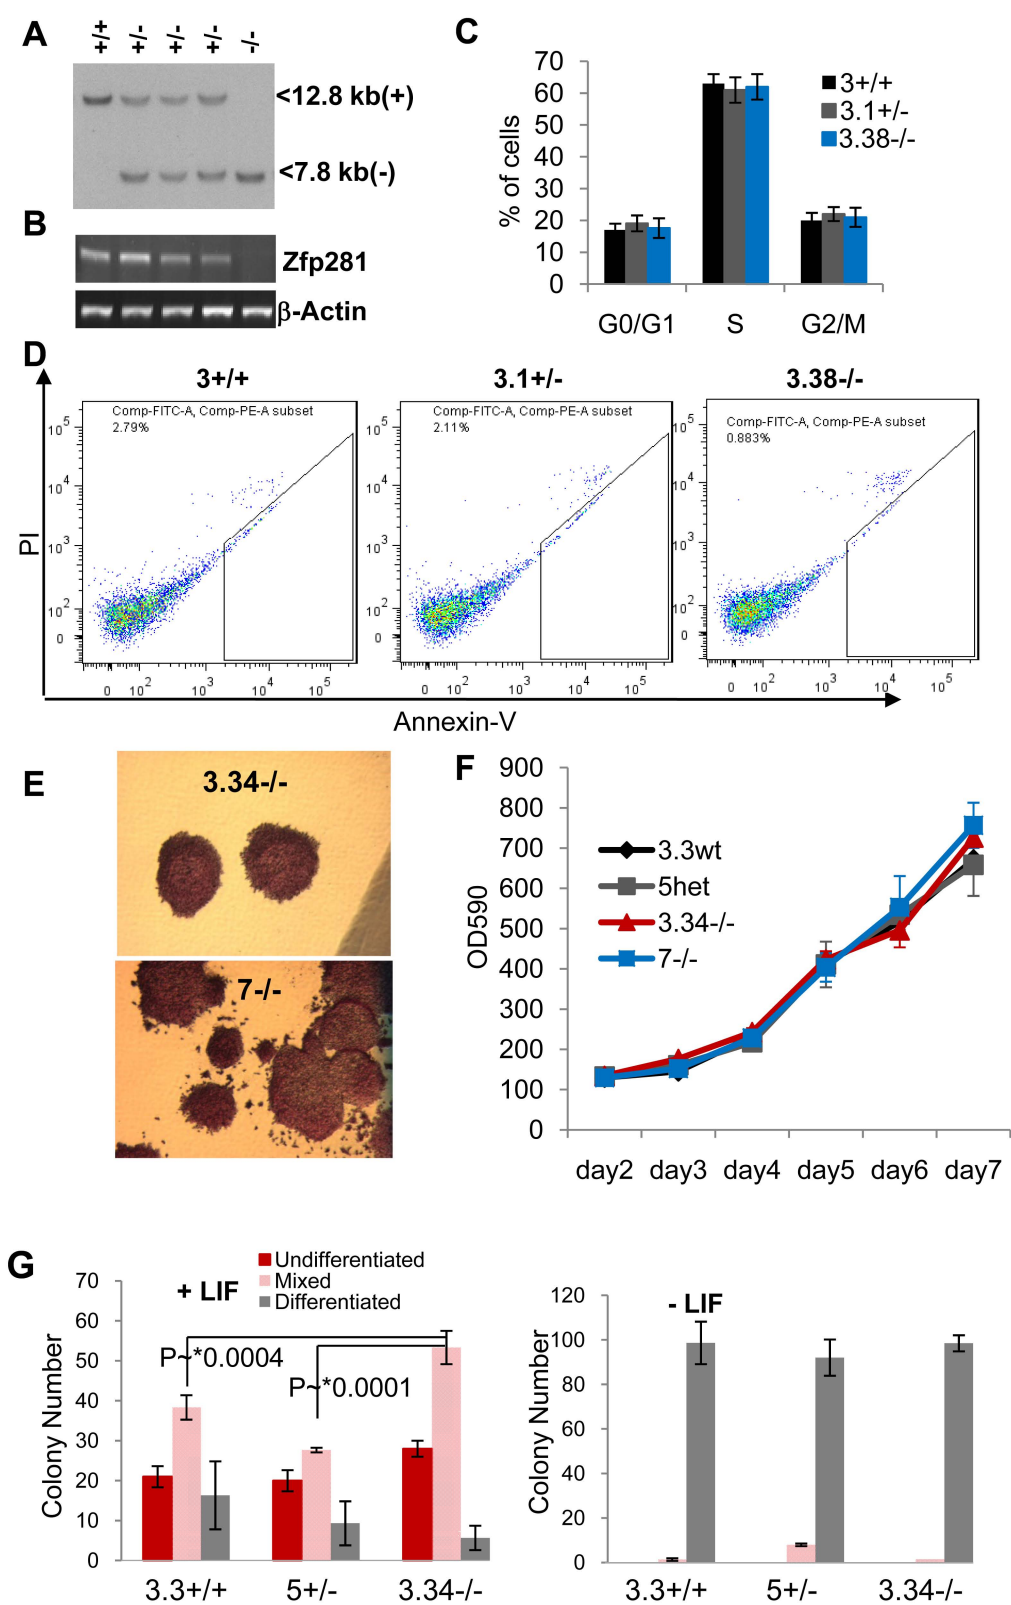

**FIGURE S1**  
Jianlong Wang
