# Supplementary material
Source: PubMed Central journal article supplement (PMC3492920)
Supplement: stem0029-1705-SD6B.pdf [file stem0029-1705-SD6B.pdf]

**Supplemental Table S2. Primers Used in This Study**

| <b>Gene for RT-PCR</b> | <b>Forward primer</b>      | <b>Reverse primer</b>      |  |
|------------------------|----------------------------|----------------------------|--|
| Zfp281                 | TGAGCCCAGGCACCCA           | TGGAGAGGTGAAGACAAGCTGAC    |  |
| Oct4                   | CTGAGGGCCAGGCAGGAGCACGAG   | CTGTAGGGAGGGCTTCGGGCACTT   |  |
| Nanog                  | AGGGTCTGCTACTGAGATGCTCTG   | CAACCACTGGTTTTTCTGCCACCG   |  |
| Rex1                   | ACGAGTGGCAGTTTTCTTCTTGGGA  | TATGACTCACTTCCAGGGGGCACT   |  |
| Tbx3                   | TCTCCATCGTGGGGACAT         | TTGTTCGCGGCCTGGCTCCTCG     |  |
| Gata6                  | TTGCTCCGGTAACAGCAGTG       | GTGGTTCGCTTGTGTAGAAGGA     |  |
| Gata4                  | CTGTCATCTCACTATGGGCA       | CCAAGTCCGAGCAGGAATTT       |  |
| Hnf4a                  | TCTGGATGACCAGGTGGCGCT      | TGCGGATGGACACACGGCTC       |  |
| Fgf5                   | CTCAGGGGATTGTAGGAATACGAGGA | GGATCGCGGACGCATAGGTATTATAG |  |
| Dppa3                  | GCATTGCAGCCGTACCTGTG       | TGGCTCACTGTCCCGTTCAA       |  |
| Lin28                  | CGAAGCCTCAAGGAGGGTGA       | TGCATTCCTTGGCATGATGG       |  |
| Plac8                  | ATTCGTTTCGTGCTCCCCAAA      | GCCACCGTTGTTCCACACAG       |  |
| Promin1                | AAGATGCAGCCACCCAGCTC       | CCCCCTTTTGACGAGGCTCT       |  |
| Dnmt3a                 | ACTTGGAGAAGCGGAGTGAA       | CTGTTCTTTGCCCTCTCCTG       |  |
| Dnmt3b                 | ACTTGGTGATTGGTGGAAAGC      | CCAGAAGAATGGACGGTTGT       |  |
| Id3                    | GCTTGGGACCCTGGGACTCT       | AGGGTGGGGACAGAGTGACG       |  |
| Tcf7l2                 | GGCGCTAACGACGAGCTGAT       | CTCTTGGCCGCTTCTTCCAA       |  |
| Lefty2                 | GTGGCTTTGCTGGGCACTCT       | CCTCACGTGGGTAGGGATGG       |  |
| Hmga2                  | ACCCAGGAAGCAGCAGCAAG       | GCGGACTCTTGCAGGATGT        |  |
| Hormad1                | CGCTTCCCTCAGGCGAAAAT       | TGTCCATAAGCACGTTCTGGA      |  |
| Stra8                  | TGACTCGTCAGGGCTTCGTG       | CTACCAGGGTGGCTCGATGG       |  |
| Cdk6                   | AGCCTGAAGCCAGCATGGAG       | TTGGGGTGCTCGAAGGTCTC       |  |
| Cdkn1c                 | TGGACAGGACAAGCGATCCA       | GCCCAGCTCCTCGTGGTCTA       |  |
| Dazl                   | TCATGTGCAGCCACGTCCTT       | CTGCTCTCCAGCAGGCCACT       |  |
| T                      | GCTTCAAGGAGCTAACTAACGAG    | CCAGCAAGAAAGAGTACATGGC     |  |
| Pax3                   | ATAAGCCCAGGACACAGAGTTGTG   | GTCTAGTCTGTGGAGGCCGAAAC    |  |
| Cdx2                   | CCTGCGACAAGGGCTTGTTTAG     | TCCCGACTTCCCTTACCATAC      |  |
| Afp                    | GAGTGCTTCCAGACAAAGAG       | ATAATGGTTGTTGCCTGGAG       |  |
| Cxcr4                  | AGGACCTGTGCCAAGTTCTTAGT    | CCAGCATTTCTACCACCATTTTCTAG |  |
| Sox17                  | CGCACGGAATTCGAACAGTA       | GTCAAATGTCGGGGTAGTTG       |  |

|                        |                             |                            |                              |
|------------------------|-----------------------------|----------------------------|------------------------------|
| Rhox6                  | GAATTGGTTTCGGATGAGGA        | GTGGCTCAGAAGAAGCCATC       |                              |
| Elf5                   | CCCTCCTCCTTTCAAAACC         | AAGTTGCCACAAGACCATCC       |                              |
| Gapdh                  | ACCCAGAAGACTGTGGATGG        | CACATTGGGGGTAGGAACAC       |                              |
|                        |                             |                            |                              |
| <b>ChIP PCR region</b> | <b>Forward Primer</b>       | <b>Reverse Primer</b>      | <b>Co-ordinates from TSS</b> |
| Gapdh                  | AAGTCATGAGGCACAGAATGGTC     | TGGGTACATGGTGACTTTCCTAGGC  |                              |
| β2-Microglobulin       | TCAGGTCCTAAGTCCTTTTCTGAGTGG | TGGACCCTTGGTGCCCTACTATCTAG |                              |
| Nanog TSS              | AATGAGGTAAAGCCTCTTTTTGG     | ACCATGGACATTGTAATGCAAA     | -130bp                       |
| Nanog kim              | TGGGGTAAACTTAAGGCTATGG      | AGCTCTAAGCCGGTTCTCATTT     | -4.55kb                      |
| Nanog Loh              | ACTCCAAGGCTAGCGATTCA        | AATAGGGAGGAGGGCGTCTA       | -4.86kb                      |
| Gata6 Set1             | CAGGAGCGCAGGCTGCAGTT        | AGAAGAACGGCCGCGACCGA       | +92bp                        |
| Gata6 Set 2            | TGACCCAGGAGGGGGCGAGT        | CCGCCACCCAGGGCAGAAGA       | -317bp                       |
| Gata6 Set 3            | CCAGAGGCGCCAGGGTCAGT        | GCTCCGACGCGAGCCTAGTT       | -2.08kb                      |
| Gata6 Set 4            | CCGCACCCCGGATTCTGCTG        | CGGACTCTGGCGACGACACC       | -2.60kb                      |
| Gata6 Set 5            | AGCGATACACATCCAGGCCCG       | GGGCGGGGGCTCTGTAGCTA       | -3.05kb                      |
| Gata6 Set 6            | CGCCCAGCGTGGGGCTTTTA        | TGTCCGCGCGCTGTTTACGT       | -3.98kb                      |
