# Supplementary material
Source: PubMed Central journal article supplement (PMC3492920)
Supplement: stem0029-1705-SD6C.pdf [file stem0029-1705-SD6C.pdf]

**Supplemental Table S3. A Complete List of Genes Shown in Fig. 4C**

| NAME   | PROBE   | GENE SYMBOL | GENE_TITLE                                                                                      | RANK IN GENE LIST | RANK METRIC SCORE | RUNNING ES  | CORE ENRICHMENT |
|--------|---------|-------------|-------------------------------------------------------------------------------------------------|-------------------|-------------------|-------------|-----------------|
| row_0  | CHD7    | CHD7        | chromodomain helicase DNA binding protein 7                                                     | 121               | 0.491048157       | 0.013122713 | No              |
| row_1  | GLT28D1 | GLT28D1     | glycosyltransferase 28 domain containing 1                                                      | 330               | 0.342615634       | 0.01659919  | No              |
| row_2  | DNMT3B  | DNMT3B      | DNA (cytosine-5-)-methyltransferase 3 beta                                                      | 463               | 0.298328817       | 0.021883564 | No              |
| row_3  | TCFAP2C | null        | null                                                                                            | 470               | 0.296753198       | 0.032898962 | No              |
| row_4  | PSIP1   | PSIP1       | PC4 and SFRS1 interacting protein 1                                                             | 765               | 0.244092599       | 0.028674169 | No              |
| row_5  | SATB1   | SATB1       | special AT-rich sequence binding protein 1 (binds to nuclear matrix/scaffold-associating DNA's) | 792               | 0.240699232       | 0.036637567 | No              |
| row_6  | SNURF   | SNURF       | SNRPN upstream reading frame                                                                    | 1206              | 0.204330549       | 0.025430612 | No              |
| row_7  | TRH     | TRH         | thyrotropin-releasing hormone                                                                   | 1336              | 0.194972292       | 0.026920257 | No              |
| row_8  | ERAS    | ERAS        | ES cell expressed Ras                                                                           | 1433              | 0.188039571       | 0.029662803 | No              |
| row_9  | SALL4   | SALL4       | sal-like 4 (Drosophila)                                                                         | 2087              | 0.155640244       | 0.005572807 | No              |
| row_10 | RBPM52  | RBPM52      | RNA binding protein with multiple splicing 2                                                    | 2952              | 0.128441319       | -           | No              |
| row_11 | ITPR1   | ITPR1       | inositol 1,4,5-triphosphate receptor, type 1                                                    | 3395              | 0.116241693       | -           | No              |
| row_12 | ANP32A  | ANP32A      | acidic (leucine-rich) nuclear phosphoprotein 32 family, member A                                | 3776              | 0.107845291       | -0.05850259 | No              |
| row_13 | TMEM55B | TMEM55B     | transmembrane protein 55B                                                                       | 3797              | 0.107448027       | -           | No              |
| row_14 | SNRPN   | SNRPN       | small nuclear ribonucleoprotein polypeptide N                                                   | 6505              | 0.061767787       | -0.17739731 | No              |
| row_15 | ATF7IP  | ATF7IP      | activating transcription factor 7 interacting protein                                           | 6518              | 0.061665889       | -0.17560251 | No              |
| row_16 | PDK1    | PDK1        | pyruvate dehydrogenase kinase, isozyme 1                                                        | 6714              | 0.059431296       | -0.18230343 | No              |
| row_17 | MTAP7   | null        | null                                                                                            | 7178              | 0.053532049       | -0.20154612 | No              |
| row_18 | RPS8    | RPS8        | ribosomal protein S8                                                                            | 7258              | 0.05224485        | -0.2031891  | No              |
| row_19 | ZRANB3  | ZRANB3      | zinc finger, RAN-binding domain containing 3                                                    | 7305              | 0.051455405       | -0.20334543 | No              |
| row_20 | IFITM1  | IFITM1      | interferon induced transmembrane protein 1 (9-27)                                               | 7310              | 0.051400036       | -0.20157357 | No              |
| row_21 | CDCA5   | CDCA5       | cell division cycle associated 5                                                                | 7806              | 0.045140654       | -0.22260626 | No              |
| row_22 | SAP30   | SAP30       | Sin3A-associated protein, 30kDa                                                                 | 8151              | 0.040913802       | -0.2368598  | No              |
| row_23 | SOCS2   | SOCS2       | suppressor of cytokine signaling 2                                                              | 8217              | 0.040074095       | -0.23832244 | No              |
| row_24 | SET     | SET         | SET translocation (myeloid leukemia-associated)                                                 | 8602              | 0.035196245       | -0.25463194 | No              |

|        |               |             |                                                                                               |       |              |             |    |
|--------|---------------|-------------|-----------------------------------------------------------------------------------------------|-------|--------------|-------------|----|
| row_25 | DDX5          | DDX5        | DEAD (Asp-Glu-Ala-Asp) box polypeptide 5                                                      | 8797  | 0.032882299  | -0.26229706 | No |
| row_26 | DTNB          | DTNB        | dystrobrevin, beta                                                                            | 8936  | 0.030956971  | -0.26746166 | No |
| row_27 | SUMO3         | SUMO3       | SMT3 suppressor of mif two 3 homolog 3 (S. cerevisiae)                                        | 9237  | 0.027616994  | -0.2801989  | No |
| row_28 | HELB          | HELB        | helicase (DNA) B                                                                              | 9332  | 0.026628224  | -0.28350598 | No |
| row_29 | SERBP1        | SERBP1      | SERPINE1 mRNA binding protein 1                                                               | 9811  | 0.021656102  | -0.3046509  | No |
| row_30 | USP1          | USP1        | ubiquitin specific peptidase 1                                                                | 9846  | 0.021147238  | -0.30540892 | No |
| row_31 | CDCA2         | CDCA2       | cell division cycle associated 2                                                              | 9941  | 0.020090438  | -0.30896476 | No |
| row_32 | MAT2A         | MAT2A       | methionine adenosyltransferase II, alpha                                                      | 10017 | 0.019158674  | -0.3116828  | No |
| row_33 | RTEL1         | RTEL1       | regulator of telomere elongation helicase 1                                                   | 10598 | 0.012642827  | -0.33785862 | No |
| row_34 | RPL22         | RPL22       | ribosomal protein L22                                                                         | 11042 | 0.008221313  | -0.35790613 | No |
| row_35 | TCEA3         | TCEA3       | transcription elongation factor A (SII), 3                                                    | 11272 | 0.005894694  | -0.3682067  | No |
| row_36 | NDG2          | null        | null                                                                                          | 11961 | -0.001813257 | -0.39975825 | No |
| row_37 | PRPF3         | PRPF3       | PRP3 pre-mRNA processing factor 3 homolog (S. cerevisiae)                                     | 12218 | -0.005089805 | -0.4113304  | No |
| row_38 | NOLA3         | NOLA3       | nucleolar protein family A, member 3 (H/ACA small nucleolar RNPs)                             | 13688 | -0.022528661 | -0.4779886  | No |
| row_39 | D11ERTD636E   | null        | null                                                                                          | 14197 | -0.029495742 | -0.50021404 | No |
| row_40 | EIF4A2        | EIF4A2      | eukaryotic translation initiation factor 4A, isoform 2                                        | 14511 | -0.033658732 | -0.5133189  | No |
| row_41 | TNFSF13       | TNFSF13     | tumor necrosis factor (ligand) superfamily, member 13                                         | 15104 | -0.042603198 | -0.5389063  | No |
| row_42 | EIF2S2        | EIF2S2      | eukaryotic translation initiation factor 2, subunit 2 beta, 38kDa                             | 15158 | -0.043515656 | -0.53968644 | No |
| row_43 | GLI2          | GLI2        | GLI-Kruppel family member GLI2                                                                | 15265 | -0.044932526 | -0.5428485  | No |
| row_44 | ADAM23        | ADAM23      | ADAM metallopeptidase domain 23                                                               | 15725 | -0.05214088  | -0.56196034 | No |
| row_45 | SOCS3         | SOCS3       | suppressor of cytokine signaling 3                                                            | 15780 | -0.053134516 | -0.5624205  | No |
| row_46 | 6720458F09RIK | null        | null                                                                                          | 15837 | -0.054061946 | -0.5629372  | No |
| row_47 | RPL7L1        | RPL7L1      | ribosomal protein L7-like 1                                                                   | 15948 | -0.055758376 | -0.5658713  | No |
| row_48 | KLF9          | KLF9        | Kruppel-like factor 9                                                                         | 16311 | -0.061642118 | -0.5801634  | No |
| row_49 | MTF2          | MTF2        | metal response element binding transcription factor 2                                         | 16366 | -0.062582664 | -0.58026403 | No |
| row_50 | SPP1          | SPP1        | secreted phosphoprotein 1 (osteopontin, bone sialoprotein I, early T-lymphocyte activation 1) | 16438 | -0.063809246 | -0.58109933 | No |
| row_51 | UTF1          | <b>UTF1</b> | undifferentiated embryonic cell transcription factor 1                                        | 16462 | -0.064121224 | -0.5797167  | No |

|        |               |               |                                                                                              |       |              |             |     |
|--------|---------------|---------------|----------------------------------------------------------------------------------------------|-------|--------------|-------------|-----|
| row_52 | SOX2          | <b>SOX2</b>   | SRY (sex determining region Y)-box 2                                                         | 16945 | -0.072903521 | -0.5990955  | No  |
| row_53 | CEP78         | CEP78         | centrosomal protein 78kDa                                                                    | 17219 | -0.078515314 | -0.6086552  | No  |
| row_54 | PARP2         | PARP2         | poly (ADP-ribose) polymerase family, member 2                                                | 17637 | -0.087663405 | -0.6244851  | No  |
| row_55 | PARP1         | PARP1         | poly (ADP-ribose) polymerase family, member 1                                                | 17660 | -0.088166259 | -0.6221416  | No  |
| row_56 | MCM5          | MCM5          | MCM5 minichromosome maintenance deficient 5, cell division cycle 46 ( <i>S. cerevisiae</i> ) | 18225 | -0.101746246 | -0.64419174 | No  |
| row_57 | CENPA         | CENPA         | centromere protein A                                                                         | 18283 | -0.103142962 | -0.642887   | No  |
| row_58 | 2410137M14RIK | null          | null                                                                                         | 18324 | -0.104371876 | -0.64075416 | No  |
| row_59 | BXDC5         | BXDC5         | brix domain containing 5                                                                     | 18481 | -0.108614817 | -0.64379126 | No  |
| row_60 | NFYB          | NFYB          | nuclear transcription factor Y, beta                                                         | 18521 | -0.10969843  | -0.64140975 | No  |
| row_61 | IFITM2        | IFITM2        | interferon induced transmembrane protein 2 (1-8D)                                            | 18729 | -0.115985543 | -0.64651036 | Yes |
| row_62 | SFXN1         | SFXN1         | sideroflexin 1                                                                               | 18768 | -0.11710231  | -0.6438012  | Yes |
| row_63 | 2010315L10RIK | null          | null                                                                                         | 18827 | -0.118882425 | -0.6419436  | Yes |
| row_64 | LRRC28        | LRRC28        | leucine rich repeat containing 28                                                            | 18942 | -0.122419268 | -0.6425251  | Yes |
| row_65 | ZSWIM1        | ZSWIM1        | zinc finger, SWIM-type containing 1                                                          | 19039 | -0.12601079  | -0.64214265 | Yes |
| row_66 | TRIB3         | TRIB3         | tribbles homolog 3 ( <i>Drosophila</i> )                                                     | 19075 | -0.127131447 | -0.63891405 | Yes |
| row_67 | NANOG         | <b>NANOG</b>  | Nanog homeobox                                                                               | 19309 | -0.137075484 | -0.64440715 | Yes |
| row_68 | PRMT3         | PRMT3         | protein arginine methyltransferase 3                                                         | 19319 | -0.137417853 | -0.63959223 | Yes |
| row_69 | EEF2          | EEF2          | eukaryotic translation elongation factor 2                                                   | 19535 | -0.146405503 | -0.6439031  | Yes |
| row_70 | 2810410M20RIK | null          | null                                                                                         | 19585 | -0.148272604 | -0.6405135  | Yes |
| row_71 | D16ERTD472E   | null          | null                                                                                         | 19687 | -0.15261592  | -0.63934857 | Yes |
| row_72 | CDCA7         | CDCA7         | cell division cycle associated 7                                                             | 19704 | -0.153275639 | -0.63425195 | Yes |
| row_73 | RBM13         | RBM13         | RNA binding motif protein 13                                                                 | 19879 | -0.161847979 | -0.6360909  | Yes |
| row_74 | WHSC2         | WHSC2         | Wolf-Hirschhorn syndrome candidate 2                                                         | 19893 | -0.162809595 | -0.6304936  | Yes |
| row_75 | INPP5D        | INPP5D        | inositol polyphosphate-5-phosphatase, 145kDa                                                 | 20023 | -0.171022817 | -0.6299152  | Yes |
| row_76 | CTBP2         | CTBP2         | C-terminal binding protein 2                                                                 | 20032 | -0.171692967 | -0.62375015 | Yes |
| row_77 | FBXO15        | <b>FBXO15</b> | F-box protein 15                                                                             | 20088 | -0.175266832 | -0.61960924 | Yes |
| row_78 | HIRIP3        | HIRIP3        | HIRA interacting protein 3                                                                   | 20158 | -0.180329308 | -0.6159191  | Yes |
| row_79 | SUV420H2      | SUV420H2      | suppressor of variegation 4-20 homolog 2 ( <i>Drosophila</i> )                               | 20211 | -0.183906779 | -0.61131155 | Yes |
| row_80 | EZH2          | EZH2          | enhancer of zeste homolog 2 ( <i>Drosophila</i> )                                            | 20238 | -0.186137646 | -0.60542417 | Yes |
| row_81 | IFITM3        | IFITM3        | interferon induced transmembrane protein 3 (1-8U)                                            | 20256 | -0.187499896 | -0.5990713  | Yes |
| row_82 | BCAT1         | BCAT1         | branched chain aminotransferase 1, cytosolic                                                 | 20332 | -0.192903802 | -0.59517854 | Yes |

|         |               |              |                                                                                                |       |              |             |     |
|---------|---------------|--------------|------------------------------------------------------------------------------------------------|-------|--------------|-------------|-----|
| row_83  | MSH6          | MSH6         | mutS homolog 6 (E. coli)                                                                       | 20334 | -0.193132266 | -0.587876   | Yes |
| row_84  | PRPS1         | PRPS1        | phosphoribosyl pyrophosphate synthetase 1                                                      | 20552 | -0.209698319 | -0.5898706  | Yes |
| row_85  | MKRN1         | MKRN1        | makorin, ring finger protein, 1                                                                | 20574 | -0.210847974 | -0.58281314 | Yes |
| row_86  | RDBP          | RDBP         | RD RNA binding protein                                                                         | 20576 | -0.21099636  | -0.5748309  | Yes |
| row_87  | ZFP42         | <b>ZFP42</b> | zinc finger protein 42 homolog (mouse)                                                         | 20591 | -0.212323233 | -0.5673957  | Yes |
| row_88  | 1110001J03RIK | null         | null                                                                                           | 20615 | -0.214697197 | -0.5602837  | Yes |
| row_89  | 1700019D03RIK | null         | null                                                                                           | 20671 | -0.220182672 | -0.5544338  | Yes |
| row_90  | DNMT3L        | DNMT3L       | DNA (cytosine-5-)-methyltransferase 3-like                                                     | 20672 | -0.220273256 | -0.54605263 | Yes |
| row_91  | BAT1A         | null         | null                                                                                           | 20746 | -0.228461891 | -0.540715   | Yes |
| row_92  | PHC1          | PHC1         | polyhomeotic homolog 1 (Drosophila)                                                            | 20784 | -0.232668951 | -0.5335627  | Yes |
| row_93  | GSTA4         | GSTA4        | glutathione S-transferase A4                                                                   | 20828 | -0.236806855 | -0.5265287  | Yes |
| row_94  | TXNIP         | TXNIP        | thioredoxin interacting protein                                                                | 20845 | -0.238375276 | -0.51819414 | Yes |
| row_95  | ZNRD1         | ZNRD1        | zinc ribbon domain containing 1                                                                | 20873 | -0.241134763 | -0.5102601  | Yes |
| row_96  | 5730590G19RIK | null         | null                                                                                           | 20882 | -0.242192239 | -0.50141263 | Yes |
| row_97  | DPPA4         | DPPA4        | developmental pluripotency associated 4                                                        | 20900 | -0.244271606 | -0.4928997  | Yes |
| row_98  | EXOSC2        | EXOSC2       | exosome component 2                                                                            | 20929 | -0.247778371 | -0.48475885 | Yes |
| row_99  | KLF2          | KLF2         | Kruppel-like factor 2 (lung)                                                                   | 20973 | -0.252423555 | -0.47713068 | Yes |
| row_100 | SF3B5         | SF3B5        | splicing factor 3b, subunit 5, 10kDa                                                           | 21115 | -0.271789193 | -0.47326973 | Yes |
| row_101 | NUDT1         | NUDT1        | nudix (nucleoside diphosphate linked moiety X)-type motif 1                                    | 21135 | -0.274910897 | -0.4636829  | Yes |
| row_102 | SLC7A3        | SLC7A3       | solute carrier family 7 (cationic amino acid transporter, y+ system), member 3                 | 21175 | -0.284072369 | -0.45466667 | Yes |
| row_103 | 1190003J15RIK | null         | null                                                                                           | 21199 | -0.289055347 | -0.4447255  | Yes |
| row_104 | TCFCP2L1      | null         | null                                                                                           | 21231 | -0.295461208 | -0.43490827 | Yes |
| row_105 | NODAL         | NODAL        | nodal homolog (mouse)                                                                          | 21259 | -0.299845278 | -0.42474037 | Yes |
| row_106 | RFC5          | RFC5         | replication factor C (activator 1) 5, 36.5kDa                                                  | 21293 | -0.305045396 | -0.41465038 | Yes |
| row_107 | SLC7A7        | SLC7A7       | solute carrier family 7 (cationic amino acid transporter, y+ system), member 7                 | 21309 | -0.308559835 | -0.4035994  | Yes |
| row_108 | ELOVL6        | ELOVL6       | ELOVL family member 6, elongation of long chain fatty acids (FEN1/Elo2, SUR4/Elo3-like, yeast) | 21312 | -0.308906019 | -0.39193776 | Yes |
| row_109 | HEATR1        | HEATR1       | HEAT repeat containing 1                                                                       | 21316 | -0.309744179 | -0.38029018 | Yes |
| row_110 | ITPK1         | ITPK1        | inositol 1,3,4-triphosphate 5/6 kinase                                                         | 21359 | -0.32028991  | -0.3700338  | Yes |
| row_111 | CHAC1         | CHAC1        | ChaC, cation transport regulator homolog 1 (E. coli)                                           | 21361 | -0.320557564 | -0.3578829  | Yes |
| row_112 | EMG1          | EMG1         | EMG1 nucleolar protein homolog (S. cerevisiae)                                                 | 21362 | -0.320598304 | -0.34568444 | Yes |

|         |               |               |                                                                                |       |              |             |     |
|---------|---------------|---------------|--------------------------------------------------------------------------------|-------|--------------|-------------|-----|
| row_113 | SLC7A5        | SLC7A5        | solute carrier family 7 (cationic amino acid transporter, y+ system), member 5 | 21472 | -0.355196297 | -0.33717924 | Yes |
| row_114 | POU5F1        | <b>POU5F1</b> | POU domain, class 5, transcription factor 1                                    | 21481 | -0.356226653 | -0.32399285 | Yes |
| row_115 | 2410146L05RIK | null          | null                                                                           | 21486 | -0.357585788 | -0.31057093 | Yes |
| row_116 | 1810009A15RIK | null          | null                                                                           | 21492 | -0.358998835 | -0.29714116 | Yes |
| row_117 | E130014J05RIK | null          | null                                                                           | 21555 | -0.38197422  | -0.28545696 | Yes |
| row_118 | SLC29A1       | SLC29A1       | solute carrier family 29 (nucleoside transporters), member 1                   | 21576 | -0.390425265 | -0.27152088 | Yes |
| row_119 | GDF3          | GDF3          | growth differentiation factor 3                                                | 21611 | -0.402611822 | -0.25776455 | Yes |
| row_120 | LSG1          | LSG1          | large subunit GTPase 1 homolog ( <i>S. cerevisiae</i> )                        | 21636 | -0.41734761  | -0.24298795 | Yes |
| row_121 | PFKP          | PFKP          | phosphofructokinase, platelet                                                  | 21649 | -0.423967302 | -0.22740793 | Yes |
| row_122 | TDH           | TDH           | L-threonine dehydrogenase                                                      | 21674 | -0.436819315 | -0.21189044 | Yes |
| row_123 | JAM2          | JAM2          | junctional adhesion molecule 2                                                 | 21681 | -0.441345453 | -0.19537346 | Yes |
| row_124 | KLHDC4        | KLHDC4        | kelch domain containing 4                                                      | 21686 | -0.444082767 | -0.1786604  | Yes |
| row_125 | RPA2          | RPA2          | replication protein A2, 32kDa                                                  | 21706 | -0.457072049 | -0.16214252 | Yes |
| row_126 | ALDH2         | ALDH2         | aldehyde dehydrogenase 2 family (mitochondrial)                                | 21708 | -0.459677011 | -0.14469823 | Yes |
| row_127 | TEX19         | null          | null                                                                           | 21738 | -0.476422101 | -0.12790368 | Yes |
| row_128 | UPP1          | UPP1          | uridine phosphorylase 1                                                        | 21805 | -0.550687551 | -0.10998396 | Yes |
| row_129 | COBL          | COBL          | cordon-bleu homolog (mouse)                                                    | 21846 | -0.65298897  | -0.08697679 | Yes |
| row_130 | RUVBL1        | RUVBL1        | RuvB-like 1 ( <i>E. coli</i> )                                                 | 21855 | -0.686460555 | -0.06122534 | Yes |
| row_131 | VEGFC         | VEGFC         | vascular endothelial growth factor C                                           | 21865 | -0.717081189 | -0.03435477 | Yes |
| row_132 | GBX2          | GBX2          | gastrulation brain homeobox 2                                                  | 21888 | -0.931904852 | 9.21E-05    | Yes |
